# Supplementary material
Source: ML conference proceedings conference paper supplement (https://openreview.net/forum?id=ey1XXNzcIZS)
Supplement: supplementary_material [file attachment]

## A APPENDIX

### A.1 WMT MODEL AND TRAINING DETAILS

For our experiments, we use the Transformer Base model in (Chen et al., 2018). The sole difference is that we use a 64k vocabulary: our model therefore contains 142M parameters. For multilingual models, we share all parameters across language pairs including softmax layer in input/output word embeddings.

We use a 64k token vocabulary formed using a Sentence Piece Model (Kudo & Richardson, 2018). The vocabulary is shared on both the encoder and decoder side. To learn a joint SPM model given our imbalanced dataset, we followed the temperature based sampling strategy with a temperature of  $T = 5$ .

Finally, our models are optimized using the Adafactor optimizer (Shazeer & Stern, 2018) with momentum factorization and a per-parameter norm clipping threshold of 1.0. We followed a learning rate of 3.0, with 40K warm-up steps for the schedule, which is decayed with the inverse square root of the number of training steps after warm-up. BLEU scores presented in this paper are calculated using SacreBLEU Post (2018) on the WMT test sets.<sup>3</sup>

### A.2 WMT DATASET DETAILS

In Table 2 we provide the training set details for the WMT<sup>4</sup> setup we use (Siddhant et al., 2020). We provide the data sizes and WMT years of the Train, Dev and Test sets we use.

### A.3 INDIVIDUAL WMT BLEU SCORES

**Bilingual baselines:** We first train Transformer Base and Big models on each language pair. The results are in Table 3.

In Tables 5 and 6 we provide individual BLEU scores of the models discussed in Table 1.

### A.4 DETAILED BREAKDOWN OF PARAMETER COUNTS ON WMT

Table 6 describes the parameter counts of different parts of the Transformers compared in Table 1.

### A.5 DETAILED BREAKDOWN OF PARAMETER COUNTS

In Table 7 we describe the parameter counts of different parts of the Transformers discussed in Section 4.3.

### A.6 RESULTS ON LARGE MOE MODEL

In Table 8 we provide aggregate BLEU scores for the results in Figure 2.

### A.7 GATING DECISIONS FOR TASK-LEVEL AND TOKEN-LEVEL MOES

In this section, we show the top expert distributions of different layers of the position-wise MoE model discussed in Section 4.3.4 in Figures 4, 5, 6 and 7.

We also show expert distributions on MoE model routing by target language from EnX that was introduced in Section 4.3.2 in Figures 8 and 9. We omit results on XEn language pairs because they belong to the same task in the context of this model.

<sup>3</sup> BLEU+case.mixed+lang.<sl>-<tl>+numrefs.1+smooth.exp+tok.<tok>+version.1.3.0, where *sl* is the source language, *tl* is the target language and *tok* = *zh* if *tl* = *zh* and *intl* otherwise.

<sup>4</sup><http://www.statmt.org/wmt20/>

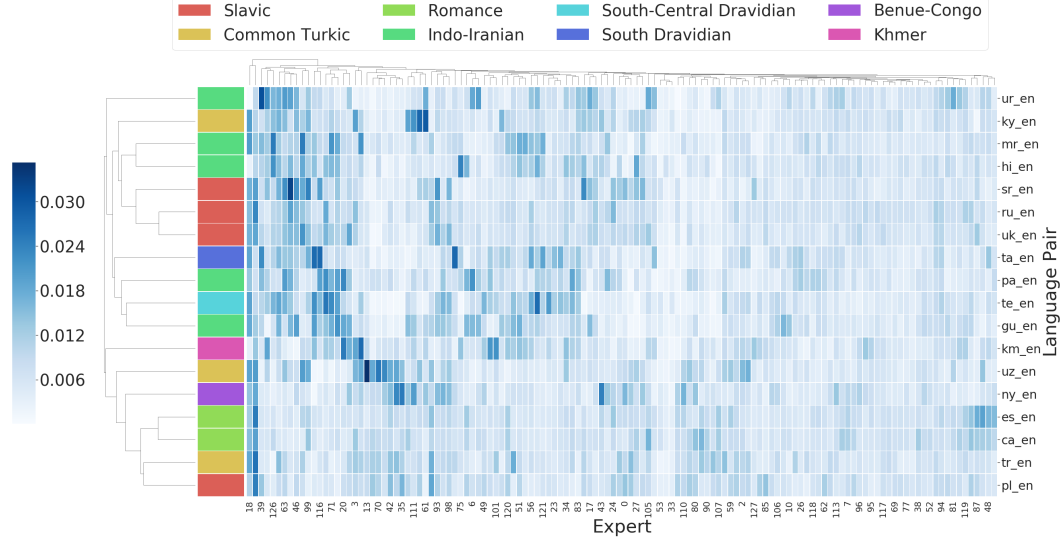

(a) Gating decisions of the first layer of the encoder for Xx-En language pairs.

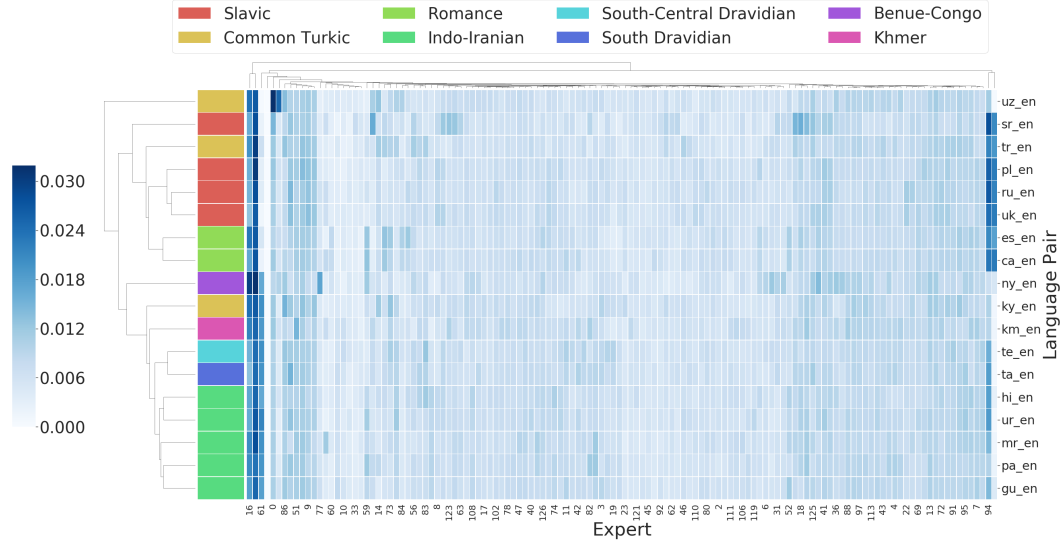

(b) Gating decisions of the last layer of the encoder for Xx-En language pairs.

Figure 5: Gating decisions of the encoder of the position-wise MoE model on Xx-En language pairs, trained on internal data on a multiway parallel dataset. In this diagram, the darker a cell, corresponding to, say en-sr and the 37th expert, the more the expert is used. In both the last layer of the encoder and decoder, the tokens from each language are fairly well distributed across experts. In (a) the first layer of the encoder, there does not seem to be any major pattern in the expert distribution whereas in (b) the last layer of the encoder, tokens from all tasks (*Xx-En*) seem to prefer the same set of few experts slightly over the others.

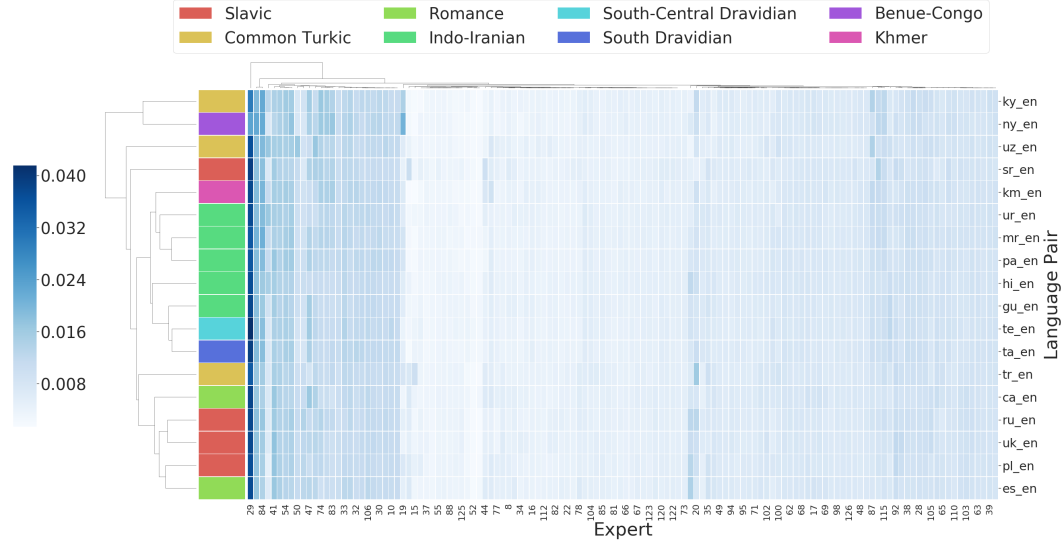

(a) Gating decisions of the first layer of the decoder for Xx-En language pairs.

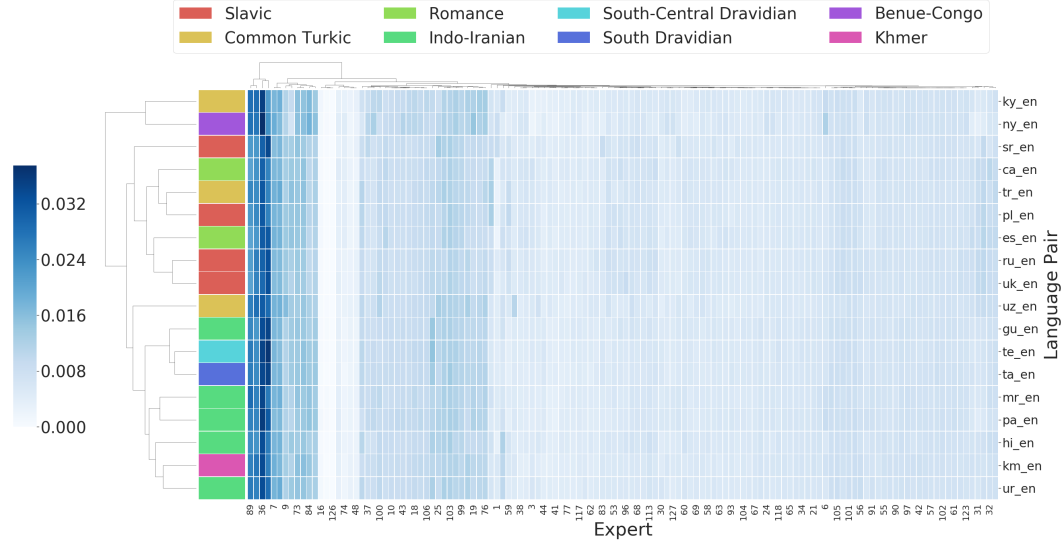

(b) Gating decisions of the last layer of the decoder for Xx-En language pairs.

Figure 6: Gating decisions of the decoder of the position-wise MoE model on Xx-En language pairs, trained on internal data on a multiway parallel dataset. In this diagram, the darker a cell, corresponding to, say en-sr and the 37th expert, the more the expert is used. In both the first and last layer of the decoder, the tokens from each language are fairly well distributed across experts. In fact, tokens from all tasks (*Xx-En*) seem to prefer the same set of few experts slightly over the others.

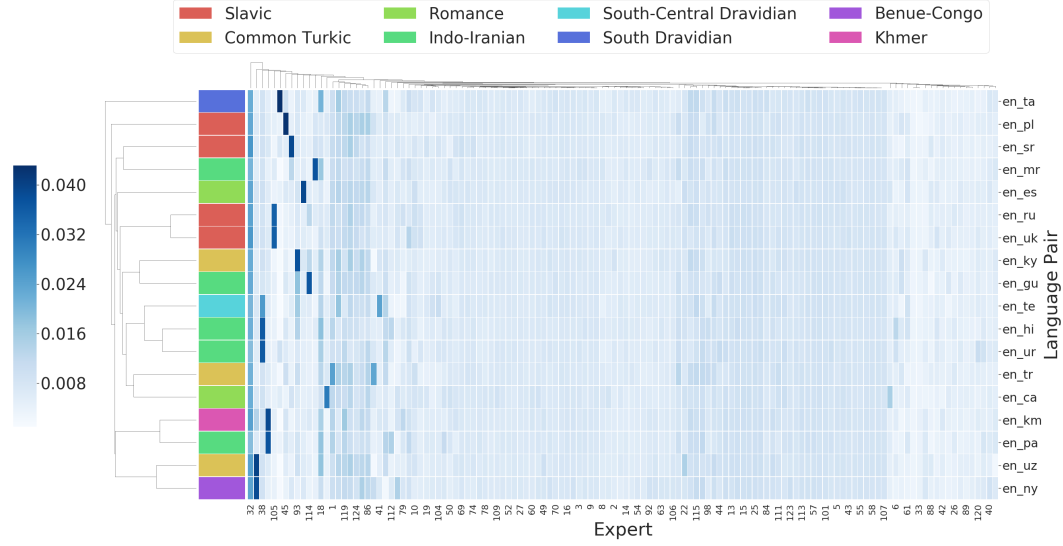

(a) Gating decisions of the first layer of the encoder for En-Xx language pairs.

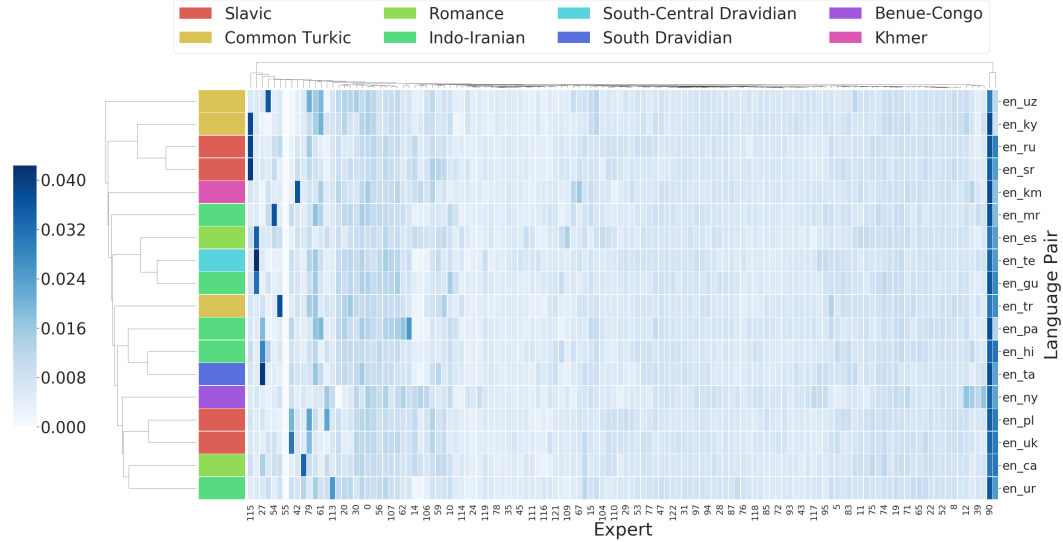

(b) Gating decisions of the last layer of the encoder for En-Xx language pairs.

Figure 7: Gating decisions of the encoder of the position-wise MoE model on En-Xx language pairs, trained on internal data on a multiway parallel dataset. In this diagram, the darker a cell, corresponding to, say en-sr and the 37th expert, the more the expert is used. In both the first and last layer of the encoder, the tokens from each language are fairly well distributed across experts. Each task (*En-Xx*) seems to slightly prefer a few experts over the other.

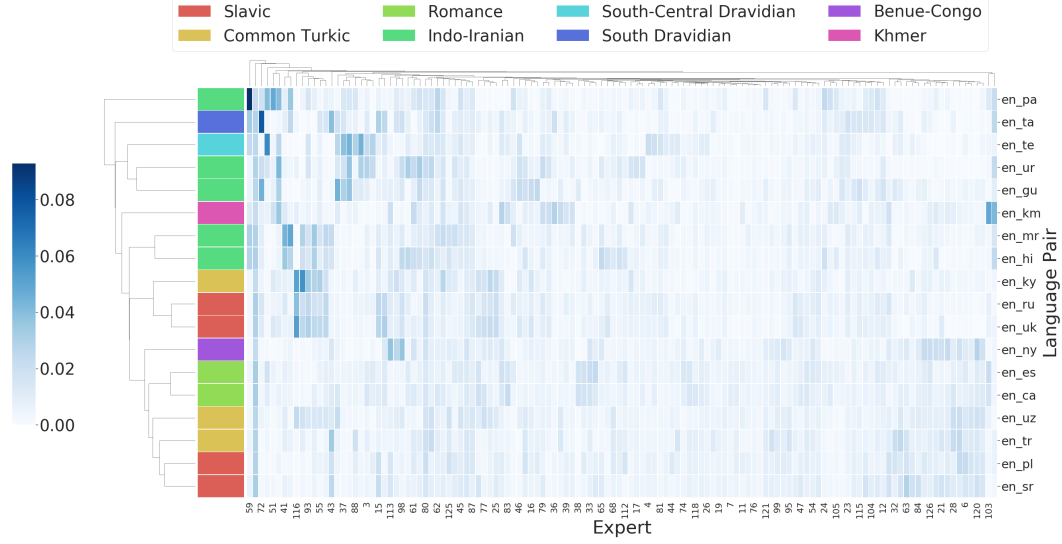

(a) Gating decisions of the first layer of the decoder for En-Xx language pairs.

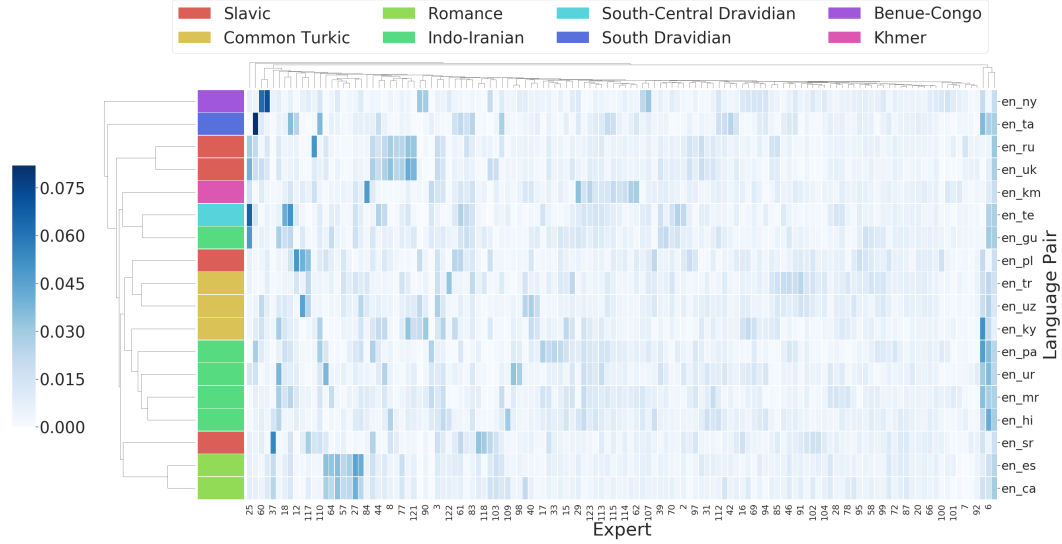

(b) Gating decisions of the last layer of the decoder for En-Xx language pairs.

Figure 8: Gating decisions of the decoder of the position-wise MoE model on En-Xx language pairs, trained on internal data on a multiway parallel dataset. In this diagram, the darker a cell, corresponding to, say en-sr and the 37th expert, the more the expert is used. In both the first and last layer of the decoder, the tokens from each language are fairly well distributed across experts. Each task (*En-Xx*) seems to slightly prefer a few experts over the other. Moreover, the set of experts appears to be similar for related languages. For example, English-Spanish and English-Catalan (two Romance Languages) have similar expert distributions and so do English-Russian and English-Ukrainian (two Slavic Languages).

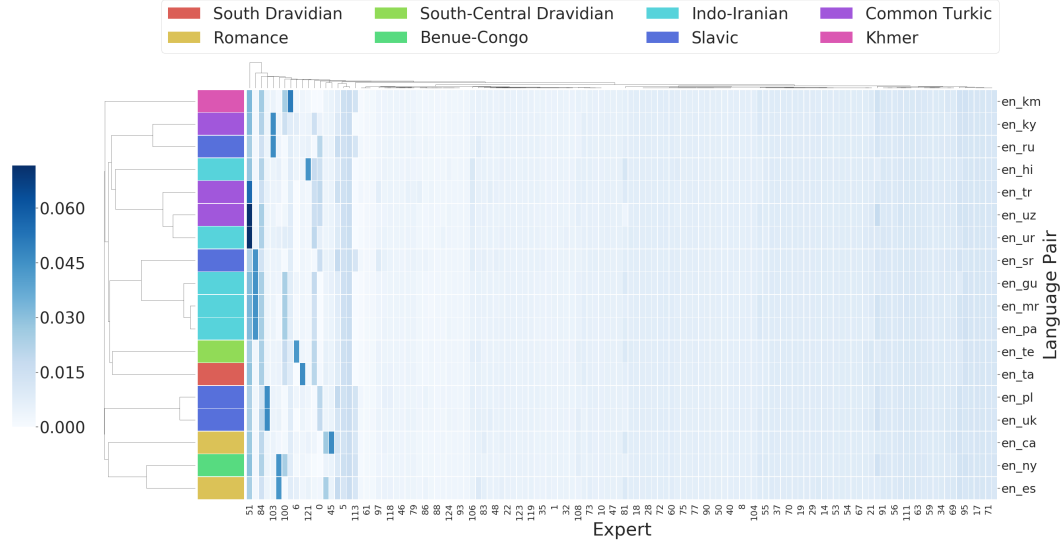

(a) Gating decisions of the first layer of the encoder for En-Xx language pairs.

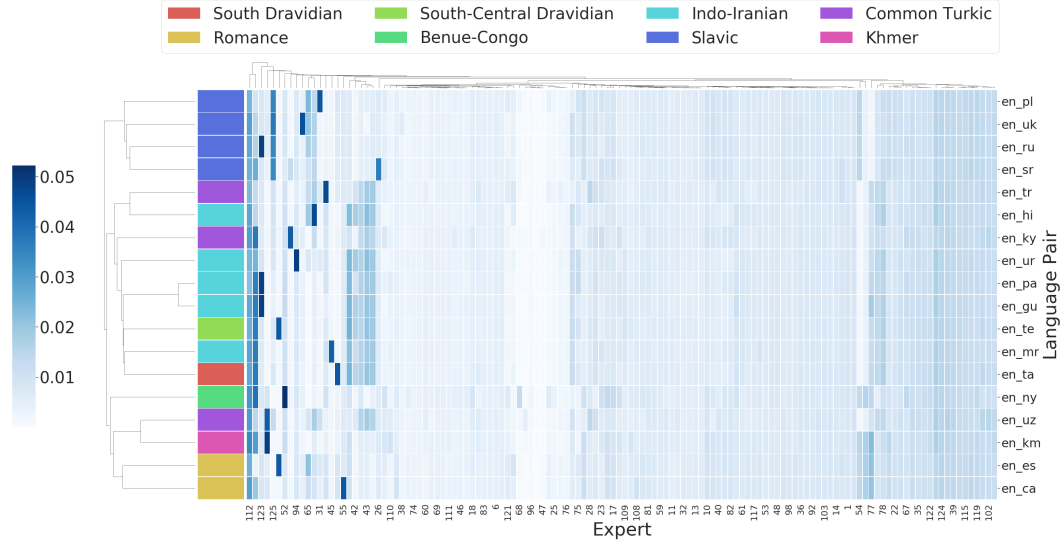

(b) Gating decisions of the last layer of the encoder for En-Xx language pairs.

Figure 9: Gating decisions of the encoder of the target language-wise MoE model on En-Xx language pairs, trained on internal data on a multiway parallel dataset. In this diagram, the darker a cell, corresponding to, say en-sr and the 37th expert, the more the expert is used. The encoder behaves similarly to that of the position-wise model: in both the first and last layer of the encoder, the tokens from each language are fairly well distributed across experts. Each task (*En-Xx*) seems to slightly prefer a few experts over the other.

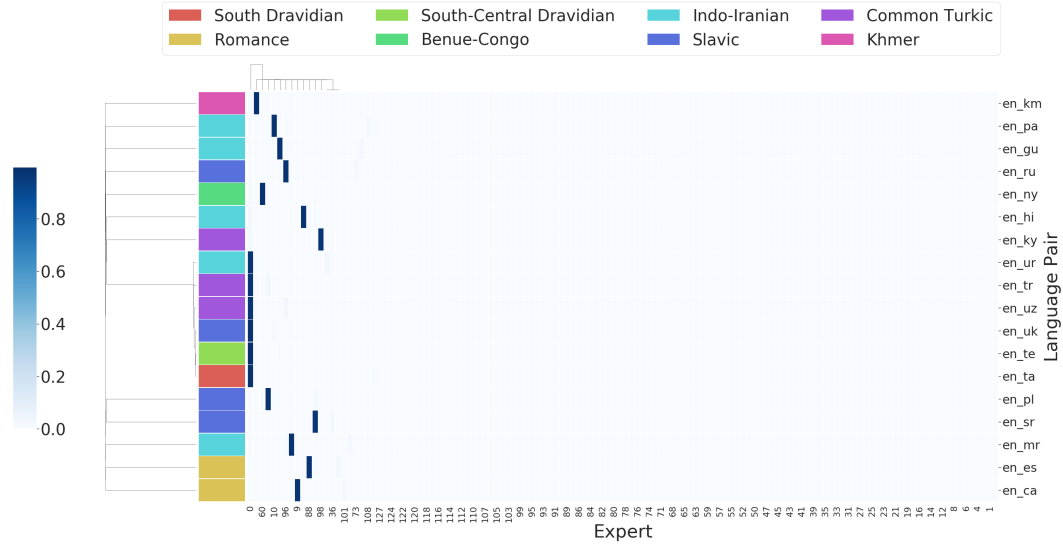

(a) Gating decisions of the first layer of the decoder for En-Xx language pairs.

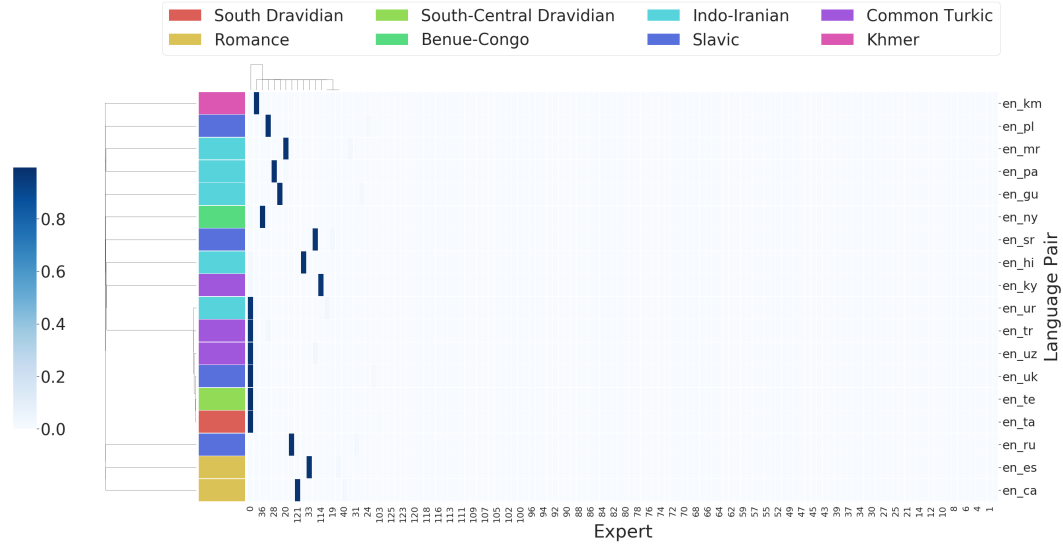

(b) Gating decisions of the last layer of the decoder for En-Xx language pairs.

Figure 10: Gating decisions of the decoder of the target language-wise MoE model on En-Xx language pairs, trained on internal data on a multiway parallel dataset. In this diagram, the darker a cell, corresponding to, say en-sr and the 37th expert, the more the expert is used. There seems to be some amount of expert sharing on a linguistic basis: en-ur, en-te and en-ta (two Dravidian Languages and an Indo-Iranian language) and en-tr, en-uz and en-uk (two Turkic languages and a Slavic language) share an expert. On the other hand, en-es and en-ca (two Romance languages) have different experts.

| Language Pair | Data Sources |        |        | # Samples |      |      |
|---------------|--------------|--------|--------|-----------|------|------|
|               | Train        | Dev    | Test   | Train     | Dev  | Test |
| cs→en         | WMT'19       | WMT'17 | WMT'18 | 64336053  | 3005 | 2983 |
| fr→en         | WMT'15       | WMT'13 | WMT'14 | 40449146  | 3000 | 3003 |
| ru→en         | WMT'19       | WMT'18 | WMT'19 | 38492126  | 3000 | 2000 |
| zh→en         | WMT'19       | WMT'18 | WMT'19 | 25986436  | 3981 | 2000 |
| es→en         | WMT'13       | WMT'13 | WMT'13 | 15182374  | 3004 | 3000 |
| fi→en         | WMT'19       | WMT'18 | WMT'19 | 6587448   | 3000 | 1996 |
| de→en         | WMT'14       | WMT'13 | WMT'14 | 4508785   | 3000 | 3003 |
| et→en         | WMT'18       | WMT'18 | WMT'18 | 2175873   | 2000 | 2000 |
| lv→en         | WMT'17       | WMT'17 | WMT'17 | 637599    | 2003 | 2001 |
| lt→en         | WMT'19       | WMT'19 | WMT'19 | 635146    | 2000 | 1000 |
| ro→en         | WMT'16       | WMT'16 | WMT'16 | 610320    | 1999 | 1999 |
| hi→en         | WMT'14       | WMT'14 | WMT'14 | 313748    | 520  | 2507 |
| kk→en         | WMT'19       | WMT'19 | WMT'19 | 222424    | 2066 | 1000 |
| tr→en         | WMT'18       | WMT'17 | WMT'18 | 205756    | 3007 | 3000 |
| gu→en         | WMT'19       | WMT'19 | WMT'19 | 155798    | 1998 | 1016 |
| en→cs         | WMT'19       | WMT'17 | WMT'18 | 64336053  | 3005 | 2983 |
| en→fr         | WMT'15       | WMT'13 | WMT'14 | 40449146  | 3000 | 3003 |
| en→ru         | WMT'19       | WMT'18 | WMT'19 | 38492126  | 3000 | 2000 |
| en→zh         | WMT'19       | WMT'18 | WMT'19 | 25986436  | 3981 | 2000 |
| en→es         | WMT'13       | WMT'13 | WMT'13 | 15182374  | 3004 | 3000 |
| en→fi         | WMT'19       | WMT'18 | WMT'19 | 6587448   | 3000 | 1996 |
| en→de         | WMT'14       | WMT'13 | WMT'14 | 4508785   | 3000 | 3003 |
| en→et         | WMT'18       | WMT'18 | WMT'18 | 2175873   | 2000 | 2000 |
| en→lv         | WMT'17       | WMT'17 | WMT'17 | 637599    | 2003 | 2001 |
| en→lt         | WMT'19       | WMT'19 | WMT'19 | 635146    | 2000 | 1000 |
| en→ro         | WMT'16       | WMT'16 | WMT'16 | 610320    | 1999 | 1999 |
| en→hi         | WMT'14       | WMT'14 | WMT'14 | 313748    | 520  | 2507 |
| en→kk         | WMT'19       | WMT'19 | WMT'19 | 222424    | 2066 | 1000 |
| en→tr         | WMT'18       | WMT'17 | WMT'18 | 205756    | 3007 | 3000 |
| en→gu         | WMT'19       | WMT'19 | WMT'19 | 155798    | 1998 | 1016 |
| fr→de         | WMT'19       | WMT'13 | WMT'13 | 9824476   | 1512 | 1701 |
| de→fr         | WMT'19       | WMT'13 | WMT'13 | 9824476   | 1512 | 1701 |

Table 2: Data sources and number of samples for the parallel data in our corpus. Please note that we don't use parallel data in Fr-De for any of the experiments in the paper.

| xx                     | cs   | fr   | ru   | zh   | es   | fi   | de   | et   | lv   | lt   | ro   | hi  | kk   | tr   | gu  |
|------------------------|------|------|------|------|------|------|------|------|------|------|------|-----|------|------|-----|
| Any-to-English (xx→en) | 31.3 | 37.2 | 36.0 | 21.7 | 32.7 | 27.3 | 31.7 | 23.1 | 15.0 | 21.3 | 30.1 | 8.5 | 11.5 | 15.9 | 1.0 |
| English-to-Any (en→xx) | 23.8 | 41.3 | 26.4 | 31.3 | 31.1 | 18.1 | 29.9 | 18.2 | 14.2 | 11.5 | 23.4 | 4.5 | 1.9  | 13.6 | 0.6 |

Table 3: Bilingual baselines. xx refers to language in the column header. (Siddhant et al., 2020)



| System                        |               | Routing Granularity |       | BLEU  |       |       |       |       |       |       |       |       |       |       |       |       |       |       |  |
|-------------------------------|---------------|---------------------|-------|-------|-------|-------|-------|-------|-------|-------|-------|-------|-------|-------|-------|-------|-------|-------|--|
|                               |               | AVG                 | xx2en | en2xx | HRL   | LRL   | cs_en | en_cs | fr_en | en_fr | ru_en | en_ru | zh_en | en_zh | es_en | en_es | de_fr | fr_de |  |
| Multilingual Transformer-Base | -             | 20.03               | 23.69 | 17.5  | 23.25 | 15.88 | 27.2  | 18.1  | 34.1  | 36.1  | 31.7  | 21.1  | 18.9  | 17.2  | 31.3  | 29.2  | 17.4  | 5.5   |  |
|                               | -             | 23.84               | 26.10 | 22.03 | 27.69 | 18.89 | 31.03 | 23.24 | 37.75 | 40.43 | 35.2  | 25.09 | 20.02 | 25.99 | 33.45 | 32.27 | 20.07 | 20.98 |  |
|                               | Sentence      | 19.88               | 24.05 | 16.83 | 22.56 | 14.14 | 27.6  | 18.7  | 34.4  | 36.5  | 32.7  | 15.1  | 20.4  | 7.2   | 31.3  | 30.1  | 13.6  | 9.1   |  |
|                               | Token         | 22.58               | 24.91 | 20.35 | 27.49 | 16.28 | 29.8  | 21.8  | 36.4  | 40.1  | 34.6  | 25.7  | 19.9  | 23.7  | 33.9  | 32.8  | 23.9  | 19.9  |  |
| Task-level MoE – 32 experts   | Language Pair | 22.04               | 25.43 | 19.5  | 25.57 | 17.5  | 26.8  | 21.7  | 35.4  | 39.2  | 33    | 21    | 22.1  | 17.9  | 32.4  | 32.1  | 12.2  | 19.1  |  |
|                               | Target        | 22.88               | 25.63 | 20.19 | 27.21 | 17.3  | 29.1  | 21.7  | 36.1  | 40.2  | 33.8  | 24.7  | 21.9  | 24.8  | 32.6  | 33.1  | 25.8  | 18.8  |  |
|                               | Language Pair | 22.45               | 25.58 | 20.34 | 26.85 | 16.79 | 30.3  | 21.5  | 36.7  | 40.3  | 34.8  | 25.1  | 21    | 25.9  | 33.6  | 32.4  | 12.9  | 16.6  |  |
|                               | Target        | 22.33               | 24.47 | 20.44 | 26.82 | 16.55 | 29.4  | 22    | 35.3  | 39.7  | 33.8  | 25.2  | 21    | 26.2  | 32.4  | 32.7  | 22.2  | 18.6  |  |
|                               | Language Pair | 23.03               | 26.16 | 20.28 | 27.23 | 17.62 | 30.1  | 23.2  | 37.5  | 39.5  | 35.5  | 21.9  | 21.7  | 15.7  | 34.5  | 33.5  | 20.1  | 20.1  |  |
|                               | Token         | 23.62               | 25.95 | 21.09 | 28.48 | 17.37 | 30.5  | 22.5  | 37.1  | 39.9  | 35.4  | 25.6  | 21.4  | 27    | 34.3  | 33.5  | 27.7  | 22.4  |  |

Table 4: Part 1 of the table with individual BLEU scores for Table1

| System                        |               | Routing Granularity |       | BLEU  |       |       |       |       |       |       |       |       |       |       |       |       |       |       |       |       |       |
|-------------------------------|---------------|---------------------|-------|-------|-------|-------|-------|-------|-------|-------|-------|-------|-------|-------|-------|-------|-------|-------|-------|-------|-------|
|                               |               | fi.en               | en.fi | de.en | en.de | et.en | en.et | lv.en | en.lv | lt.en | en.lt | ro.en | en.ro | hi.en | en.hi | kk.en | en.kk | tr.en | en.tr | gu.en | en.gu |
| Multilingual Transformer-Base | -             | 23.9                | 17    | 28.6  | 22    | 23.1  | 16.1  | 17.2  | 14.9  | 24.6  | 11.4  | 33.4  | 23.9  | 19.2  | 10.4  | 13.5  | 2.5   | 20.9  | 17.5  | 7.8   | 5.1   |
|                               | -             | 27.89               | 20.83 | 30.72 | 27.37 | 28.49 | 17.59 | 20.32 | 17.76 | 26.1  | 26.1  | 35.84 | 26.83 | 20.87 | 14.61 | 10.4  | 5.23  | 22.69 | 19.44 | 10.68 | 7.67  |
|                               | Sentence      | Sentence 23.5       | 17.2  | 29.4  | 21.8  | 22    | 15.4  | 17.9  | 14.7  | 24.6  | 11.6  | 33.6  | 24.8  | 20.5  | 12.2  | 14    | 2.9   | 21.4  | 17.9  | 7.4   | 6.3   |
| Token-level MoE – 32 experts  | Token         | 27.3                | 20.2  | 31.2  | 26.7  | 27    | 19.9  | 18.7  | 17    | 23.7  | 13.9  | 33.7  | 26.5  | 19.8  | 11.5  | 8.5   | 2.4   | 20.3  | 18    | 8.8   | 5.1   |
|                               | Language Pair | 25.2                | 20.1  | 31.3  | 26.9  | 24.7  | 19.2  | 18.4  | 16.3  | 25.1  | 13.6  | 34.8  | 25.7  | 22.5  | 13.1  | 15    | 2.4   | 23.4  | 18.2  | 11.4  | 5.1   |
|                               | Target        | 25.6                | 19.5  | 30.7  | 26.8  | 24.8  | 19.8  | 18.4  | 15.7  | 25.9  | 13.6  | 34.9  | 25.8  | 21.7  | 12.3  | 15.5  | 2.4   | 22.5  | 17.7  | 11    | 4.8   |
| Task-level MoE – 32 experts   | Language Pair | 26.7                | 20    | 32.2  | 26.9  | 26.8  | 19.6  | 18.9  | 16.3  | 25.1  | 13.3  | 34.2  | 25.8  | 21.1  | 12.6  | 12.6  | 2.3   | 21.7  | 18.4  | 8     | 4.7   |
|                               | Target        | 23.7                | 19.8  | 30.7  | 26.1  | 24.1  | 19.9  | 18    | 16.5  | 24.4  | 13.6  | 33.1  | 26.1  | 20    | 12.7  | 12.7  | 2.9   | 21.1  | 18.2  | 7.4   | 5     |
|                               | Language Pair | 27.8                | 21.1  | 32.3  | 27    | 27.6  | 21    | 19.8  | 17.2  | 26    | 14.6  | 36.4  | 26.8  | 20.4  | 14.2  | 12.3  | 3.3   | 21.5  | 19.4  | 9     | 5.8   |
| Token                         | Token         | 27.9                | 20.5  | 32    | 27.1  | 27.3  | 20.5  | 19.4  | 17.6  | 25.9  | 14.4  | 36.2  | 26.6  | 20.1  | 13.3  | 11.6  | 3     | 21.2  | 19.2  | 9     | 5.7   |

Table 5: Part 2 of the table with individual BLEU scores for Table1

| System                         | Routing Granularity |               | No. of Parameters |         |         |         |       | Effective n(params) at inference time |         |       |
|--------------------------------|---------------------|---------------|-------------------|---------|---------|---------|-------|---------------------------------------|---------|-------|
|                                | Encoder             | Decoder       | Vocabulary        | Encoder | Decoder | Softmax | Total | Encoder                               | Decoder | Total |
| Multilingual Transformer-Base  | -                   | -             | 33M               | 19M     | 25M     | 65M     | 142M  | 19M                                   | 25M     | 142M  |
| Token-level MoE – 32 experts   | Token               | Token         |                   |         |         |         |       | 214M                                  | 221M    | 533M  |
| Sentence-level MoE – 32 expert | Sentence            | Sentence      |                   |         |         |         |       | 214M                                  | 221M    | 533M  |
|                                | Language Pair       | Language Pair |                   |         |         |         |       | 25M                                   | 32M     | 155M  |
|                                | Target              | Target        |                   |         |         |         |       | 25M                                   | 32M     | 155M  |
| Task-level MoE – 32 experts    | Language Pair       | Token         | 33M               | 214M    | 221M    | 65M     | 533M  | 214M                                  | 25M     | 338M  |
|                                | Target              | Token         |                   |         |         |         |       | 214M                                  | 25M     | 338M  |
|                                | Token               | Language Pair |                   |         |         |         |       | 19M                                   | 221M    | 338M  |
|                                | Token               | Target        |                   |         |         |         |       | 19M                                   | 221M    | 338M  |

Table 6: We break down the parameter counts of the models we compare in Section 4.2 by components.

| System                        | Routing Granularity |          | No. of Parameters |         |         |         | Effective n(params) at inference time |         |         |       |
|-------------------------------|---------------------|----------|-------------------|---------|---------|---------|---------------------------------------|---------|---------|-------|
|                               | Encoder             | Decoder  | Vocabulary        | Encoder | Decoder | Softmax | Total                                 | Encoder | Decoder | Total |
| Multilingual Transformer-Big  | -                   | -        |                   | 126M    | 151M    |         | 473M                                  | 126M    | 151M    | 473M  |
| Token-level MoE – 128 experts | Token               | Token    | 65M               | 6.5B    | 6.5B    | 131M    | 13B                                   | 6.5B    | 6.5B    | 13.3B |
| Task-level MoE – 128 experts  | Token               | Language |                   | 6.5B    | 6.5B    |         | 13B                                   | 6.5B    | 201M    | 6.9B  |
| Task-level MoE – 128 experts  | Token               | Target   |                   | 6.5B    | 6.5B    |         | 13B                                   | 6.5B    | 201M    | 6.9B  |

Table 7: We break down the parameter counts of the models we compare in Section 4.3.2 by components.

| System                        | Routing Granularity |          | BLEU         |              |              |               |              |              |               |              |              |
|-------------------------------|---------------------|----------|--------------|--------------|--------------|---------------|--------------|--------------|---------------|--------------|--------------|
|                               | Encoder             | Decoder  | AVG          | En-X         | X-En         | High-25 (EnX) | Mid 52 (EnX) | Low 25 (Enx) | High-25 (XEn) | Mid 52 (XEn) | Low 25 (XEn) |
| Multilingual Transformer-Big  | -                   | -        | 24.49        | 18.61        | 30.37        | 28.03         | 16.9         | 12.75        | 33.84         | 30.23        | 26.96        |
| Token-level MoE – 128 experts | Token               | Token    | <b>28.37</b> | 20.51        | <b>36.26</b> | 30.99         | 18.94        | 13.33        | 40.14         | 36.74        | 31.03        |
| Task-level MoE – 128 experts  | Token               | Language | 28.09        | 20.66        | 35.52        | 31.21         | 19.17        | 13.28        | 39.69         | 36.42        | 29.16        |
| Task-level MoE – 128 experts  | Token               | Target   | 27.83        | <b>20.76</b> | 34.90        | 31.05         | 19.23        | 13.68        | 38.88         | 35.28        | 29.93        |

Table 8: We summarize the results in Figure 2 on scaled up 128 expert MoE models. Here, *High-25* means the average BLEU of the 25 highest resource languages, *Low-25* means the average BLEU of the 25 lowest resource languages while *Mid-52* is the average BLEU of the remaining 52 languages.
